# Supplementary material
Source: PubMed Central journal article supplement (PMC6541230)
Supplement: NIHMS1024687-supplement-S-1_Table.pdf [file NIHMS1024687-supplement-S-1_Table.pdf]

**Supplementary Table S1: CD9 and CD81 Gene expression analysis**

| <b>DATASET</b> | <b>COMPARISON</b>                                      | <b>n NORMAL</b> | <b>n CANCER</b> | <b>n TOTAL</b> | <b>P Value</b> |
|----------------|--------------------------------------------------------|-----------------|-----------------|----------------|----------------|
| TCGA           | Prostate Adenocarcinoma vs. Normal                     | 61              | 45              | 106            | 0.861          |
| Wallace        | Prostate Adenocarcinoma vs. Normal                     | 20              | 69              | 89             | 0.993          |
| Vanaja         | Prostate Adenocarcinoma vs. Normal                     | 8               | 27              | 35             | 0.64           |
| Lapointe       | Prostate Carcinoma vs. Normal                          | 41              | 62              | 103            | 1              |
| Yu             | Prostate Carcinoma vs. Normal                          | 23              | 65              | 88             | 0.356          |
| Taylor         | Prostate Carcinoma vs. Normal                          | 29              | 31              | 60             | 0.786          |
| Liu            | Prostate Carcinoma vs. Normal                          | 13              | 44              | 57             | 0.946          |
| Holzbeierlein  | Prostate Carcinoma vs. Normal                          | 4               | 40              | 44             | 0.342          |
| Luo            | Prostate Carcinoma vs. Normal                          | 15              | 15              | 30             | 0.523          |
| LaTulippe      | Prostate Carcinoma vs. Normal                          | 3               | 23              | 26             | 0.245          |
| Arredouani     | Prostate Carcinoma vs. Normal                          | 8               | 13              | 21             | 0.897          |
| Varambally     | Prostate Carcinoma vs. Normal                          | 6               | 7               | 13             | 0.084          |
| Magee          | Prostate Carcinoma vs. Normal                          | 4               | 8               | 12             | 0.98           |
| Tomlins        | Prostatic Intraepithelial Neoplasia Epithelia vs. Norm | 16              | 13              | 29             | 0.934          |
| TCGA           | Prostate Adenocarcinoma vs. Normal                     | 61              | 45              | 106            | 0.35           |

|               |                                         |    |     |     |       |
|---------------|-----------------------------------------|----|-----|-----|-------|
| Vanaja        | Prostate Adenocarcinoma vs. Normal      | 8  | 27  | 35  | 0.93  |
| Tomlins       | Prostate Carcinoma Epithelia vs. Normal | 13 | 10  | 23  | 0.777 |
| Taylor        | Prostate Carcinoma vs. Normal           | 29 | 131 | 160 | 1     |
| Singh         | Prostate Carcinoma vs. Normal           | 50 | 52  | 102 | 0.289 |
| Lapointe      | Prostate Carcinoma vs. Normal           | 39 | 60  | 99  | 0.897 |
| Yu            | Prostate Carcinoma vs. Normal           | 23 | 65  | 88  | 0.987 |
| Grasso        | Prostate Carcinoma vs. Normal           | 28 | 59  | 87  | 1     |
| Liu           | Prostate Carcinoma vs. Normal           | 13 | 44  | 57  | 0.998 |
| Holzbeierlein | Prostate Carcinoma vs. Normal           | 4  | 40  | 44  | 0.912 |
| Welsh         | Prostate Carcinoma vs. Normal           | 9  | 25  | 34  | 0.814 |
| Luo           | Prostate Carcinoma vs. Normal           | 15 | 15  | 30  | 0.955 |
| LaTulippe     | Prostate Carcinoma vs. Normal           | 3  | 23  | 26  | 0.992 |
| Arredouani    | Prostate Carcinoma vs. Normal           | 8  | 13  | 21  | 0.999 |
| Varambally    | Prostate Carcinoma vs. Normal           | 6  | 7   | 13  | 0.997 |

|       |                               |   |   |    |       |
|-------|-------------------------------|---|---|----|-------|
| Magee | Prostate Carcinoma vs. Normal | 4 | 8 | 12 | 0.991 |
|-------|-------------------------------|---|---|----|-------|

## REFERENCE

The Cancer Genome Atlas - Prostate Adenocarcinoma DNA Copy Number Data

Tumor immunobiological differences in prostate cancer between African-American and European-American men. *Cancer Res.* 2008 Feb 1;68(3):927-36.

Vanaja DK, Chevillat JC, Iturria SJ, Young CY. Transcriptional silencing of zinc finger protein 185 identified by expression profiling is associated with prostate cancer progression. *Cancer Res.* 2003 Jul 15;63(14):3877-82.

P, DeMarzo AM, Tibshirani R, Botstein D, Brown PO, Brooks JD, Pollack JR. Gene expression profiling identifies clinically relevant subtypes of prostate cancer. *Proc Natl Acad Sci U S A.* 2004 Jan 20;101(3):811-6. Epub 2004 Jan 7.

Becich M, Luo JH. Gene expression alterations in prostate cancer predicting tumor aggression and preceding development of malignancy. *J Clin Oncol.* 2004 Jul 15;22(14):2790-9.

Mitsiades N, Landers T, Dolgalev I, Major JE, Wilson M, Socci ND, Lash AE, Heguy A, Eastham JA, Scher HI, Reuter VE, Scardino PT, Sander C, Sawyers CL, Gerald WL. Integrative genomic profiling of human prostate cancer. *Cancer Cell.* 2010

Moreno CS. Sex-determining region Y box 4 is a transforming oncogene in human prostate cancer cells. *Cancer Res.* 2006 Apr 15;66(8):4011-9.

WL. Gene expression analysis of human prostate carcinoma during hormonal therapy identifies androgen-responsive genes and mechanisms of therapy resistance. *Am J Pathol.* 2004 Jan;164(1):217-27.

prostate cancers. *Mol Carcinog.* 2002 Jan;33(1):25-35.

prostate cancer reveals distinct transcriptional programs associated with metastatic disease. *Cancer Res.* 2002 Aug 1;62(15):4499-506.

Identification of the transcription factor single-minded homologue 2 as a potential biomarker and immunotherapy target in prostate cancer. *Clin Cancer Res.* 2009 Sep 15;15(18):5794-802.

Pienta KJ, Ghosh D, Rubin MA, Chinnaiyan AM. Integrative genomic and proteomic analysis of prostate cancer reveals signatures of metastatic progression. *Cancer Cell.* 2005 Nov;8(5):393-406.

Magee JA, Araki T, Patil S, Ehrig T, True L, Humphrey PA, Catalona WJ, Watson MA, Milbrandt J. Expression profiling reveals hepsin overexpression in prostate cancer. *Cancer Res.* 2001 Aug 1;61(15):5692-6.

Shah RB, Chinnaiyan AM. Integrative molecular concept modeling of prostate cancer progression. *Nat Genet.* 2007 Jan;39(1):41-51.

The Cancer Genome Atlas - Prostate Adenocarcinoma DNA Copy Number Data

|                                                                                                                                                                                                                                                                                                                  |
|------------------------------------------------------------------------------------------------------------------------------------------------------------------------------------------------------------------------------------------------------------------------------------------------------------------|
| <p>Vanaja DK, Chevillie JC, Iturria SJ, Young CY. Transcriptional silencing of zinc finger protein 185 identified by expression profiling is associated with prostate cancer progression. <i>Cancer Res.</i> 2003 Jul 15;63(14):3877-82.</p>                                                                     |
| <p>Shah RB, Chinnaiyan AM. Integrative molecular concept modeling of prostate cancer progression. <i>Nat Genet.</i> 2007 Jan;39(1):41-51.</p>                                                                                                                                                                    |
| <p>Mitsiades N, Landers T, Dolgalev I, Major JE, Wilson M, Socci ND, Lash AE, Heguy A, Eastham JA, Scher HI, Reuter VE, Scardino PT, Sander C, Sawyers CL, Gerald WL. Integrative genomic profiling of human prostate cancer. <i>Cancer Cell.</i> 2010</p>                                                       |
| <p>Loda M, Kantoff PW, Golub TR, Sellers WR. Gene expression correlates of clinical prostate cancer behavior. <i>Cancer Cell.</i> 2002 Mar;1(2):203-9.</p>                                                                                                                                                       |
| <p>P, DeMarzo AM, Tibshirani R, Botstein D, Brown PO, Brooks JD, Pollack JR. Gene expression profiling identifies clinically relevant subtypes of prostate cancer. <i>Proc Natl Acad Sci U S A.</i> 2004 Jan 20;101(3):811-6. Epub 2004 Jan 7.</p>                                                               |
| <p>Becich M, Luo JH. Gene expression alterations in prostate cancer predicting tumor aggression and preceding development of malignancy. <i>J Clin Oncol.</i> 2004 Jul 15;22(14):2790-9.</p>                                                                                                                     |
| <p>IA, Ateeq B, Chun SY, Siddiqui J, Sam L, Anstett M, Mehra R, Prensner JR, Palanisamy N, Ryslik GA, Vandin F, Raphael BJ, Kunju LP, Rhodes DR, Pienta KJ, Chinnaiyan AM, Tomlins SA. The mutational landscape of lethal castration-resistant prostate cancer. <i>Nature.</i> 2012 Jul 12;487(7406):239-43.</p> |
| <p>Moreno CS. Sex-determining region Y box 4 is a transforming oncogene in human prostate cancer cells. <i>Cancer Res.</i> 2006 Apr 15;66(8):4011-9.</p>                                                                                                                                                         |
| <p>WL. Gene expression analysis of human prostate carcinoma during hormonal therapy identifies androgen-responsive genes and mechanisms of therapy resistance. <i>Am J Pathol.</i> 2004 Jan;164(1):217-27.</p>                                                                                                   |
| <p>expression identifies candidate markers and pharmacological targets in prostate cancer. <i>Cancer Res.</i> 2001 Aug 15;61(16):5974-8.</p>                                                                                                                                                                     |
| <p>prostate cancers. <i>Mol Carcinog.</i> 2002 Jan;33(1):25-35.</p>                                                                                                                                                                                                                                              |
| <p>prostate cancer reveals distinct transcriptional programs associated with metastatic disease. <i>Cancer Res.</i> 2002 Aug 1;62(15):4499-506.</p>                                                                                                                                                              |
| <p>Identification of the transcription factor single-minded homologue 2 as a potential biomarker and immunotherapy target in prostate cancer. <i>Clin Cancer Res.</i> 2009 Sep 15;15(18):5794-802.</p>                                                                                                           |
| <p>Pienta KJ, Ghosh D, Rubin MA, Chinnaiyan AM. Integrative genomic and proteomic analysis of prostate cancer reveals signatures of metastatic progression. <i>Cancer Cell.</i> 2005 Nov;8(5):393-406.</p>                                                                                                       |

Magee JA, Araki T, Patil S, Ehrig T, True L, Humphrey PA, Catalona WJ, Watson MA, Milbrandt J. Expression profiling reveals hepsin overexpression in prostate cancer. *Cancer Res.* 2001 Aug 1;61(15):5692-6.
