# Supplementary material
Source: PubMed Central journal article supplement (PMC6541230)
Supplement: NIHMS1024687-supplement-S-2_Table.pdf [file NIHMS1024687-supplement-S-2_Table.pdf]

**Supplementary Table S2: Demographic and health information of prostate cancer patients.**

|                                       |                         | <b>Non-Treated (n=41)</b> | <b>Treated with Abiraterone Only (n=16)</b> | <b>Treated with Enzalutamide Only (n=13)</b> |
|---------------------------------------|-------------------------|---------------------------|---------------------------------------------|----------------------------------------------|
| <b>Race</b>                           | <i>Caucasian</i>        | 30 (73.2%)                | 9 (56.3%)                                   | 11 (84.6%)                                   |
|                                       | <i>African American</i> | 10 (24.4%)                | 7 (43.7%)                                   | 2 (15.4%)                                    |
|                                       | <i>Unknown</i>          | 1 (2.4%)                  | 0 (0%)                                      | 0 (0%)                                       |
| <b>Age</b>                            | <i>18-64</i>            | 18 (43.9%)                | 3 (18.8%)                                   | 3 (23.1%)                                    |
|                                       | <i>≥65</i>              | 23 (56.1%)                | 13 (81.2%)                                  | 10 (76.9%)                                   |
| <b>Metastasis</b>                     | <i>None</i>             | 16 (39.0%)                | 1 (6.3%)                                    | 0 (0%)                                       |
|                                       | <i>Bone</i>             | 23 (56.1%)                | 14 (87.4%)                                  | 11 (84.6%)                                   |
|                                       | <i>Other Sites</i>      | 2 (4.9%)                  | 1 (6.3%)                                    | 2 (15.4%)                                    |
| <b>Gleason Score</b>                  | <i>&lt;4</i>            | 0 (0%)                    | 0 (0%)                                      | 0 (0%)                                       |
|                                       | <i>&gt;4</i>            | 38 (92.7%)                | 14 (87.5%)                                  | 13 (100%)                                    |
|                                       | <i>Unknown</i>          | 3 (7.3%)                  | 2 (12.5%)                                   | 0 (0%)                                       |
| <b>PSA Level Post-Therapy (ng/mL)</b> | <i>&lt;4</i>            | 24 (58.5%)                | 7 (43.7%)                                   | 5 (38.5%)                                    |
|                                       | <i>&gt;4</i>            | 17 (41.5%)                | 9 (56.3%)                                   | 8 (61.5%)                                    |
|                                       | <i>Unknown</i>          | 0 (0%)                    | 0 (0%)                                      | 0 (0%)                                       |
| <b>Family History of Cancer</b>       | <i>No</i>               | 12 (29.3%)                | 5 (31.3%)                                   | 3 (23.1%)                                    |
|                                       | <i>Yes</i>              | 25 (61%)                  | 10 (62.4%)                                  | 8 (61.5%)                                    |
|                                       | <i>Unknown</i>          | 4 (9.7%)                  | 1 (6.3%)                                    | 2 (15.4%)                                    |
| <b>Prostatectomy</b>                  | <i>No</i>               | 0 (0%)                    | 8 (50%)                                     | 4 (30.8%)                                    |
|                                       | <i>Yes</i>              | 15 (36.6%)                | 8 (50%)                                     | 6 (46.2%)                                    |
|                                       | <i>Unknown</i>          | 26 (63.4%)                | 0 (0%)                                      | 3 (23%)                                      |
| <b>Tobacco Use</b>                    | <i>No</i>               | 13 (31.7%)                | 4 (25%)                                     | 5 (38.5%)                                    |
|                                       | <i>Yes</i>              | 27 (65.9%)                | 12 (75%)                                    | 8 (61.5%)                                    |
|                                       | <i>Unknown</i>          | 1 (2.4%)                  | 0 (0%)                                      | 0 (0%)                                       |
